# Supplementary material
Source: publisher site journal article supplement (https://www.dovepress.com/article/250066)
Supplement: Supplementary file 1 [file get_supplementary_file.php]

**Supplementary Table 1**

| Gene | Sequence (5’-3’) |
| --- | --- |
| PSAT1-homo-187 | GCCGCACTCAGTGTTGTTAGA |
| PSAT1-homo-242 | GGCATTAGTGTTCTTGAAATG |
| PSAT1-homo-329 | GCTGTTCCAGACAACTATAAG |
| PSAT1-homo-419 | GCAGGAAGGTGTGCTGACTAT |
| Negative control | GTTCTCCGAACGTGTCACGT |

**Supplementary Table 2**

| Antibody | Dilution | Company | Catalogue |
| --- | --- | --- | --- |
| PSAT1 | WB : 1:2000  IHC : 1:200 | Proteintech | 10501-1-AP |
| Cyclin D1 | WB: 1:1000 | Cell Signaling Technology | 2978 |
| CDK4 | WB: 1:1000 | Cell Signaling Technology | 12790 |
| Bax | WB: 1:2000 | Abcam | Ab32503 |
| cleaved Caspase-3 | WB: 1:1000 | Cell Signaling Technology | 9662 |
| α-Tubulin | WB: 1:1000 | Cell Signaling Technology | 3873 |
